# Supplementary material for: Molecular Epidemiology, Antimicrobial Susceptibility, and Clinical Features of Methicillin-Resistant Staphylococcus aureus Bloodstream Infections over 30 Years in Barcelona, Spain (1990–2019)
Source: MDPI journal article supplement (doi:10.3390/microorganisms10122401), 2022-12-03
Supplement: s1 [file s1]

Supplementary Table S3. Comparison of the clinical characteristics of the three major clones in the 2008- 2019 period.

|                                | Overall (2008-2019)    |                                 |                          |                      |                               |                                |                                |
|--------------------------------|------------------------|---------------------------------|--------------------------|----------------------|-------------------------------|--------------------------------|--------------------------------|
|                                | Total<br><i>n</i> =260 | CC5 Paediatric<br><i>n</i> =112 | CC8-ST8<br><i>n</i> =109 | CC22<br><i>n</i> =39 | <i>P</i> -value<br>CC5 vs ST8 | <i>P</i> -value<br>CC22 vs CC5 | <i>P</i> -value<br>CC22 vs ST8 |
| <b>Characteristics [n (%)]</b> |                        |                                 |                          |                      |                               |                                |                                |
| Age [mean±SD; (range)]         | 71.2±13.7 (19-98)      | 71.1±12.7 (31-94)               | 71.4±71.4 (19-98)        | 71.13±11.1 (39-86)   | 0.89                          | 0.99                           | 0.93                           |
| Female sex                     | 112 (43)               | 51 (46)                         | 44 (40)                  | 17 (44)              | 0.49                          | 0.854                          | 0.851                          |
| <b>Source of Infection</b>     |                        |                                 |                          |                      |                               |                                |                                |
| Vascular Catheter              | 61 (23)                | 29 (26)                         | 23 (21)                  | 9 (23)               | 0.431                         | 0.832                          | 0.822                          |
| SST                            | 45 (17)                | 21 (19)                         | 18 (17)                  | 6 (15)               | 0.726                         | 0.809                          | -                              |
| Urinary                        | 27 (10)                | 15 (13)                         | 9 (8)                    | 3 (8)                | 0.281                         | 0.407                          | -                              |
| Osteoarticular                 | 23 (9)                 | 11 (10)                         | 11 (10)                  | 1 (3)                | -                             | 0.188                          | 0.184                          |
| Respiratory Tract              | 37 (14)                | 10 (9)                          | 19 (17)                  | 8 (21)               | 0.074                         | 0.082                          | 0.638                          |
| Endocarditis                   | 14 (5)                 | 7 (6)                           | 5 (5)                    | 2 (5)                | 0.768                         | -                              | -                              |
| Other                          | 14 (5)                 | 6 (5)                           | 8 (7)                    | -                    | 0.591                         | 0.339                          | 0.111                          |
| Unknown                        | 39 (15)                | 13 (12)                         | 16 (15)                  | 10 (26)              | 0.553                         | 0.067                          | 0.143                          |
| <b>Acquisition</b>             |                        |                                 |                          |                      |                               |                                |                                |
| CA                             | 24 (9)                 | 5 (4)                           | 16 (15)                  | 3 (8)                | <b>0.011</b>                  | 0.426                          | 0.403                          |
| CO-HCA                         | 142 (55)               | 62 (55)                         | 60 (55)                  | 20 (51)              | -                             | 0.711                          | 0.711                          |
| HO-HCA                         | 94 (36)                | 45 (40)                         | 33 (30)                  | 16 (41)              | 0.159                         | -                              | 0.239                          |
| <b>CCI</b>                     |                        |                                 |                          |                      |                               |                                |                                |
| >2                             | 233 (91)               | 101 (91)                        | 96 (90)                  | 36 (97)              | 0.669                         | -                              | 0.5619                         |
| ≥5                             | 137 (54)               | 48 (43)                         | 60 (56)                  | 29 (78)              | 0.081                         | <b>0.0008</b>                  | <b>0.038</b>                   |
| Not Available                  | 4                      | 1                               | 1                        | 2                    | -                             | 0.164                          | 0.171                          |
| <b>30-days Mortality</b>       | 99 (38)                | 41 (37)                         | 44 (40)                  | 14 (36)              | 0.583                         | -                              | 0.704                          |

‡ Other sources: biliary, pericardium, central nervous system. SST, skin and soft tissue; HO-HCA, hospital-onset healthcare-associated; CO-HCA community-onset healthcare-associated and CA, community-acquired; CCI, Charlson's comorbidity index. P-values in bold are statistically significant.
