# Supplementary material for: Molecular Epidemiology, Antimicrobial Susceptibility, and Clinical Features of Methicillin-Resistant Staphylococcus aureus Bloodstream Infections over 30 Years in Barcelona, Spain (1990–2019)
Source: MDPI journal article supplement (doi:10.3390/microorganisms10122401), 2022-12-03
Supplement: s1 [file s1]

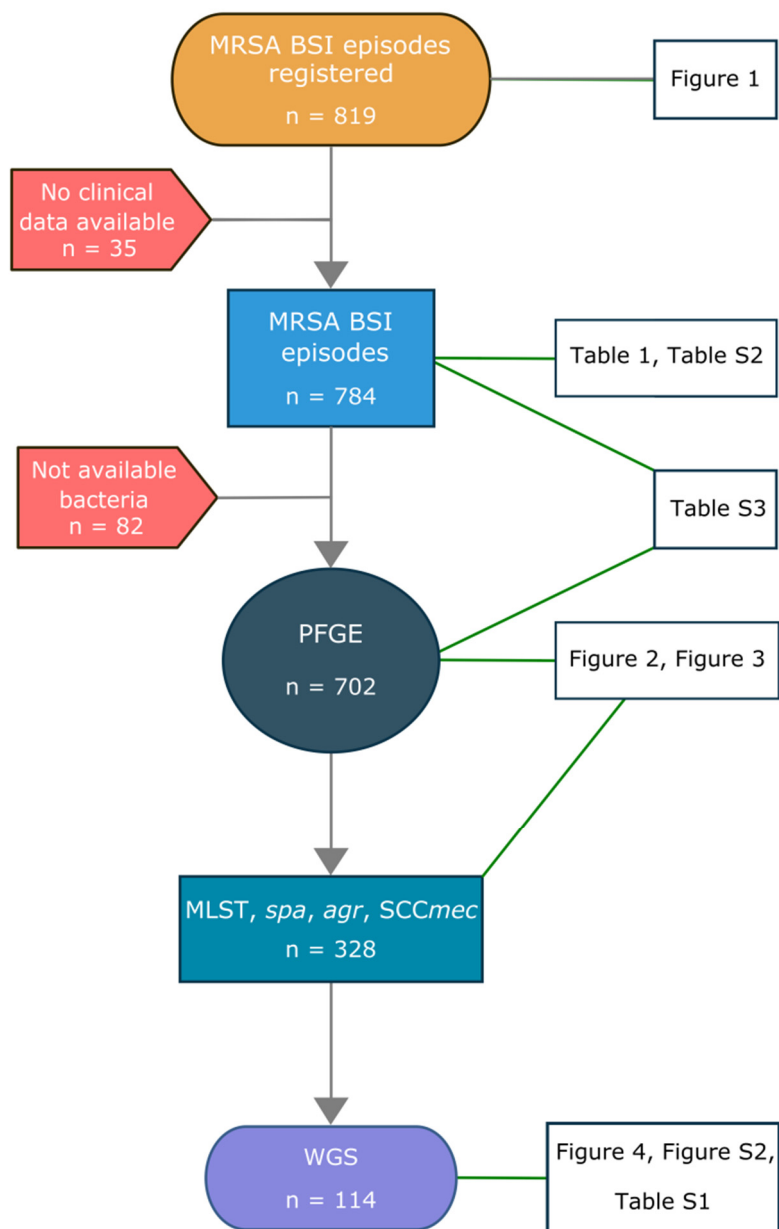

**Supplementary Figure S1. Study flow diagram.** Red polygons show the excluded episodes or isolates. The green lines connect the episodes/samples used with the respective figure/table of the work. BSI, bloodstream infection; MLST, multi locus sequence typing; *SCCmec*, staphylococcal chromosomal cassette *mec* typing; PFGE, pulsed-field gel electrophoresis; *spa*, *spa*-typing; *agr*, accessory gene regulator typing.
