# Supplementary material for: Molecular Epidemiology, Antimicrobial Susceptibility, and Clinical Features of Methicillin-Resistant Staphylococcus aureus Bloodstream Infections over 30 Years in Barcelona, Spain (1990–2019)
Source: MDPI journal article supplement (doi:10.3390/microorganisms10122401), 2022-12-03
Supplement: s1 [file s1]

**Supplementary Table S2. Source of infection of MRSA-BSI episodes by acquisition.** The table shows the total number of episodes and the percentage (in parentheses).

| Acquisition                | Time periods   |        |                |        |                |         |       |                |        |       |                |         |       |
|----------------------------|----------------|--------|----------------|--------|----------------|---------|-------|----------------|--------|-------|----------------|---------|-------|
|                            | 1990-1995      |        | 1996-2001      |        | 2002-2007      |         |       | 2008-2013      |        |       | 2014 – 2019    |         |       |
|                            | <i>n</i> = 137 |        | <i>n</i> = 142 |        | <i>n</i> = 207 |         |       | <i>n</i> = 149 |        |       | <i>n</i> = 149 |         |       |
|                            | HO-HCA         | CO-HCA | HO-HCA         | CO-HCA | HO-HCA         | CO-HCA  | CA    | HO-HCA         | CO-HCA | CA    | HO-HCA         | CO-HCA  | CA    |
| <b>Source of infection</b> |                |        |                |        |                |         |       |                |        |       |                |         |       |
| <b>Vascular Catheter</b>   | 74 (54)        | 4 (3)  | 65 (46)        | 6 (4)  | 33 (16)        | 29 (14) | -     | 25 (17)        | 9 (6)  | 1 (1) | 11 (7)         | 19 (13) | -     |
| <b>Endocarditis</b>        | 5 (4)          | -      | 1 (1)          | 2 (1)  | 1 (0.5)        | 3 (1)   | -     | 2 (1)          | 1 (1)  | 1 (1) | 2 (1)          | 7 (5)   | 2 (1) |
| <b>Osteoarticular</b>      | 1 (1)          | 3 (2)  | 2 (1)          | 3 (2)  | 4 (2)          | 8 (4)   | -     | 5 (3)          | 6 (4)  | -     | 2 (1)          | 11 (7)  | -     |
| <b>Respiratory Tract</b>   | 1 (1)          | -      | 11 (8)         | 3 (2)  | 10 (5)         | 7 (3)   | -     | 5 (3)          | 12 (8) | -     | 13 (9)         | 9 (6)   | 2 (1) |
| <b>SST</b>                 | 7 (5)          | 1 (1)  | 5 (4)          | 7 (5)  | 9 (4)          | 23 (11) | 2 (1) | 7 (5)          | 13 (9) | -     | 3 (2)          | 17 (11) | 9 (6) |
| <b>Urinary</b>             | -              | 2 (1)  | 3 (2)          | 2 (1)  | 9 (4)          | 13 (6)  | -     | 5 (3)          | 13 (9) | 3 (2) | 1 (1)          | 9 (6)   | 2 (1) |
| <b>Other†</b>              | 14 (10)        | -      | 16 (11)        | 2 (1)  | 18 (9)         | 9 (4)   | -     | 8 (5)          | 3 (2)  | 1 (1) | 2 (1)          | 6 (4)   | 2 (1) |
| <b>Unknown</b>             | 22 (16)        | 3 (2)  | 10 (7)         | 4 (3)  | 14 (7)         | 15 (7)  | -     | 13 (9)         | 14 (9) | 2 (1) | 5 (3)          | 11 (7)  | 4 (3) |

† Other sources: biliary, pericardium, central nervous system. SST, skin and soft tissue; HA, hospital acquired; HCA healthcare-associated and CA, community-acquired.
