# Supplementary material for: Molecular Epidemiology, Antimicrobial Susceptibility, and Clinical Features of Methicillin-Resistant Staphylococcus aureus Bloodstream Infections over 30 Years in Barcelona, Spain (1990–2019)
Source: Microorganisms. 2022 Dec 3;10(12):2401. doi: 10.3390/microorganisms10122401 (PMC9788191; doi:10.3390/microorganisms10122401)
Supplement: Supplementary file 1 [file microorganisms-10-02401-s001.zip]

Archive with 5 entries (5 files):
- Figure S1.pdf
- Figure S2.pdf
- Table S1.xlsx
- Table S2.pdf
- Table S3.pdf
