# Supplementary material for: Molecular Epidemiology, Antimicrobial Susceptibility, and Clinical Features of Methicillin-Resistant Staphylococcus aureus Bloodstream Infections over 30 Years in Barcelona, Spain (1990–2019)
Source: Microorganisms. 2022 Dec 3;10(12):2401. doi: 10.3390/microorganisms10122401 (PMC9788191; doi:10.3390/microorganisms10122401)
Supplement: Supplementary file 1 [file microorganisms-10-02401-s001.zip › Table S1.xlsx]

## Sheet: Dataset
	Supplementary Table S1. Summary of MRSA bloodstream isolates included in this study.
	Sequence Data			Patient data				Clonal Complex	MLST								Pulsed Field Type	spa typing		Panton-Valentine Leukocidin		Arginine catabolic mobile element							cop operon				Copper and mercury resistance element									Staphylococcal chromosomal cassette mec
	Strain ID	Accession number	Year	Sex	Age	Origin	Acquisition	CC	ST	arcC	aroE	glpF	gmk	pta	tpi	yqiL	PFT	spa-type	spa Repetitions	PVL	lukFS-PV	ACME	ACME type	arcABCD	opp3ABC	speG	argR	aliD	copA	copB	mco	copL	COMER	abi-α	NPD	LysR-like	MSF-transporter	merR	mercury transporter	merA	merB	SCCmec	ccr type	mec gene complex	mecA	ΔmecRI	mecR1	mecI	IS
	ST125dlv-HUB519	ERS12345084	2014	F	78	Osteoarticular	HCA-MRSA-BSI	5	125	1	4	1	4	12	1	54	C.3	t067	26-23-17-34-17-20-17-12-17	Negative	-	Negative	-	-	-	speG	-	-	-	-	-	-	Negative	-	-	-	-	-	-	-	-	IVc	A2B2	B	mecA	ΔmecR	-	-	IS1272
	ST125-HUB134	ERS12345085	2002	F	74	Unknown	HCA-MRSA-BSI	5	125	1	4	1	4	12	1	54	C.2	t067	26-23-17-34-17-20-17-12-17	Negative	-	Negative	-	-	-	speG	-	-	-	-	-	-	Negative	-	-	-	-	-	-	-	-	IVc	A2B2	B	mecA	ΔmecR	-	-	IS1272
	ST125-HUB212	ERS12345086	2001	F	73	Catheter	HA-MRSA-BSI	5	125	1	4	1	4	12	1	54	C.2	t067	26-23-17-34-17-20-17-12-17	Negative	-	Negative	-	-	-	speG	-	-	-	-	-	-	Negative	-	-	-	-	-	-	-	-	IVc	A2B2	B	mecA	ΔmecR	-	-	IS1272
	ST125-HUB251	ERS12345087	2008	M	93	Urinary	HCA-MRSA-BSI	5	125	1	4	1	4	12	1	54	C.2	t067	26-23-17-34-17-20-17-12-17	Negative	-	Negative	-	-	-	speG	-	-	-	-	-	-	Negative	-	-	-	-	-	-	-	-	IVc	A2B2	B	mecA	ΔmecR	-	-	IS1272
	ST125-HUB254	ERS12345088	2009	M	70	Skin and soft tissue	HA-MRSA-BSI	5	125	1	4	1	4	12	1	54	C.2	t067	26-23-17-34-17-20-17-12-17	Negative	-	Negative	-	-	-	speG	-	-	-	-	-	-	Negative	-	-	-	-	-	-	-	-	IVc	A2B2	B	mecA	ΔmecR	-	-	IS1272
	ST125-HUB305	ERS12345089	2000	M	74	Catheter	HA-MRSA-BSI	5	125	1	4	1	4	12	1	54	C.2	t067	26-23-17-34-17-20-17-12-17	Negative	-	Negative	-	-	-	speG	-	-	-	-	-	-	Negative	-	-	-	-	-	-	-	-	IVc	A2B2	B	mecA	ΔmecR	-	-	IS1272
	ST125-HUB36	ERS12345090	2007	M	67	Skin and soft tissue	HCA-MRSA-BSI	5	125	1	4	1	4	12	1	54	C.2	t067	26-23-17-34-17-20-17-12-17	Negative	-	Negative	-	-	-	speG	-	-	-	-	-	-	Negative	-	-	-	-	-	-	-	-	IVc	A2B2	B	mecA	ΔmecR	-	-	IS1272
	ST125-HUB369	ERS12345091	2010	F	53	Unknown	HA-MRSA-BSI	5	125	1	4	1	4	12	1	54	C.8	t067	26-23-17-34-17-20-17-12-17	Negative	-	Negative	-	-	-	-	-	-	-	-	-	-	Negative	-	-	-	-	-	-	-	-	IVc	A2B2	B	mecA	ΔmecR	-	-	IS1272
	ST125-HUB412	ERS12345092	2011	M	57	Osteoarticular	HA-MRSA-BSI	5	125	1	4	1	4	12	1	54	C.14	t837	26-17-20-17-12-17	Negative	-	Negative	-	-	-	-	-	-	-	-	-	-	Negative	-	-	-	-	-	-	-	-	IVc	A2B2	B	mecA	ΔmecR	-	-	IS1272
	ST125-HUB42	ERS12345093	2006	F	84	Catheter	HCA-MRSA-BSI	5	125	1	4	1	4	12	1	54	C.2	t067	26-23-17-34-17-20-17-12-17	Negative	-	Negative	-	-	-	-	-	-	-	-	-	-	Negative	-	-	-	-	-	-	-	-	IVc	A2B2	B	mecA	ΔmecR	-	-	IS1272
	ST125-HUB428	ERS12345094	2012	F	88	Urinary	HCA-MRSA-BSI	5	125	1	4	1	4	12	1	54	C.5	t067	26-23-17-34-17-20-17-12-17	Negative	-	Negative	-	-	-	speG	-	-	-	-	-	-	Negative	-	-	-	-	-	-	-	-	IVc	A2B2	B	mecA	ΔmecR	-	-	IS1272
	ST125-HUB469	ERS12345095	2013	M	68	Others	HA-MRSA-BSI	5	125	1	4	1	4	12	1	54	C.3	t067	26-23-17-34-17-20-17-12-17	Negative	-	Negative	-	-	-	speG	-	-	-	-	-	-	Negative	-	-	-	-	-	-	-	-	IVc	A2B2	B	mecA	ΔmecR	-	-	IS1272
	ST125-HUB503	ERS12345096	2014	F	92	Skin and soft tissue	HCA-MRSA-BSI	5	125	1	4	1	4	12	1	54	C.1	t1006	26-23-17-17-20-17-12-17	Negative	-	Negative	-	-	-	speG	-	-	-	-	-	-	Negative	-	-	-	-	-	-	-	-	IVc	A2B2	B	mecA	ΔmecR	-	-	IS1272
	ST125-HUB505	ERS12345097	2014	M	56	Catheter	HA-MRSA-BSI	5	125	1	4	1	4	12	1	54	C.2	t2226	26-23-17-34-17-20-17-17	Negative	-	Negative	-	-	-	-	-	-	-	-	-	-	Negative	-	-	-	-	-	-	-	-	IVc	A2B2	B	mecA	ΔmecR	-	-	IS1272
	ST125-HUB507	ERS12345098	2014	F	87	Osteoarticular	HCA-MRSA-BSI	5	125	1	4	1	4	12	1	54	C.3	t067	26-23-17-34-17-20-17-12-17	Negative	-	Negative	-	-	-	speG	-	-	-	-	-	-	Negative	-	-	-	-	-	-	-	-	IVc	A2B2	B	mecA	ΔmecR	-	-	IS1272
	ST125-HUB509	ERS12345099	2014	M	78	Others	CA-MRSA-BSI	5	125	1	4	1	4	12	1	54	C.2	t067	26-23-17-34-17-20-17-12-17	Negative	-	Negative	-	-	-	speG	-	-	-	-	-	-	Negative	-	-	-	-	-	-	-	-	IVc	A2B2	B	mecA	ΔmecR	-	-	IS1272
	ST125-HUB51	ERS12345100	2006	M	79	Urinary	HCA-MRSA-BSI	5	125	1	4	1	4	12	1	54	C.2	t067	26-23-17-34-17-20-17-12-17	Negative	-	Negative	-	-	-	-	-	-	-	-	-	-	Negative	-	-	-	-	-	-	-	-	IVc	A2B2	B	mecA	ΔmecR	-	-	IS1272
	ST125-HUB542	ERS12345101	2015	M	79	Urinary	HCA-MRSA-BSI	5	125	1	4	1	4	12	1	54	C.6	t067	26-23-17-34-17-20-17-12-17	Negative	-	Negative	-	-	-	speG	-	-	-	-	-	-	Negative	-	-	-	-	-	-	-	-	IVc	A2B2	B	mecA	ΔmecR	-	-	IS1272
	ST125-HUB545	ERS12345102	2015	M	84	Endocarditis	HCA-MRSA-BSI	5	125	1	4	1	4	12	1	54	C.4	t1954	26-17-34-17-20-17-12-17	Negative	-	Negative	-	-	-	-	-	-	-	-	-	-	Negative	-	-	-	-	-	-	-	-	IVc	A2B2	B	mecA	ΔmecR	-	-	IS1272
	ST125-HUB546	ERS12345103	2015	F	68	Skin and soft tissue	HCA-MRSA-BSI	5	125	1	4	1	4	12	1	54	C.3	t067	26-23-17-34-17-20-17-12-17	Negative	-	Negative	-	-	-	speG	-	-	-	-	-	-	Negative	-	-	-	-	-	-	-	-	IVc	A2B2	B	mecA	ΔmecR	-	-	IS1272
	ST125-HUB570	ERS12345104	2018	F	68	Urinary	HCA-MRSA-BSI	5	125	1	4	1	4	12	1	54	C.3	t067	26-23-17-34-17-20-17-12-17	Negative	-	Negative	-	-	-	speG	-	-	-	-	-	-	Negative	-	-	-	-	-	-	-	-	IVc	A2B2	B	mecA	ΔmecR	-	-	IS1272
	ST125-HUB593	ERS12345105	2016	F	81	Osteoarticular	HA-MRSA-BSI	5	125	1	4	1	4	12	1	54	C.2	t067	26-23-17-34-17-20-17-12-17	Negative	-	Negative	-	-	-	-	-	-	-	-	-	-	Negative	-	-	-	-	-	-	-	-	IVc	A2B2	B	mecA	ΔmecR	-	-	IS1272
	ST125-HUB634	ERS12345106	2017	M	66	Endocarditis	HCA-MRSA-BSI	5	125	1	4	1	4	12	1	54	C.2	t067	26-23-17-34-17-20-17-12-17	Negative	-	Negative	-	-	-	-	-	-	-	-	-	-	Negative	-	-	-	-	-	-	-	-	IVc	A2B2	B	mecA	ΔmecR	-	-	IS1272
	ST125-HUB67	ERS12345107	2005	F	40	Catheter	HA-MRSA-BSI	5	125	1	4	1	4	12	1	54	C.2	t067	26-23-17-34-17-20-17-12-17	Negative	-	Negative	-	-	-	speG	-	-	-	-	-	-	Negative	-	-	-	-	-	-	-	-	IVc	A2B2	B	mecA	ΔmecR	-	-	IS1272
	ST125slv-HUB531	ERS12345108	2014	M	72	Osteoarticular	HCA-MRSA-BSI	5	125	1	4	1	4	12	1	54	C.3	t067	26-23-17-34-17-20-17-12-17	Negative	-	Negative	-	-	-	speG	-	-	-	-	-	-	Negative	-	-	-	-	-	-	-	-	IVc	A2B2	B	mecA	ΔmecR	-	-	IS1272
	ST146-HUB123	ERS12345109	2003	M	80	Catheter	HA-MRSA-BSI	5	146	1	43	1	4	12	1	10	C.7	t010	26-17-34-17-20-17-12-17-16	Negative	-	Negative	-	-	-	-	-	-	-	-	-	-	Negative	-	-	-	-	-	-	-	-	IVc	A2B2	B	mecA	ΔmecR	-	-	IS1272
	ST146-HUB139	ERS12345110	2002	F	54	Skin and soft tissue	HCA-MRSA-BSI	5	146	1	43	1	4	12	1	10	C.7	t002	26-23-17-34-17-20-17-12-17-16	Negative	-	Negative	-	-	-	-	-	-	-	-	-	-	Negative	-	-	-	-	-	-	-	-	IVc	A2B2	B	mecA	ΔmecR	-	-	IS1272
	ST146-HUB204	ERS12345111	1997	F	81	Catheter	HCA-MRSA-BSI	5	146	1	43	1	4	12	1	10	C.7	t002	26-23-17-34-17-20-17-12-17-16	Negative	-	Negative	-	-	-	-	-	-	-	-	-	-	Negative	-	-	-	-	-	-	-	-	IVc	A2B2	B	mecA	ΔmecR	-	-	IS1272
	ST146-HUB222	ERS12345112	2001	M	68	Endocarditis	HA-MRSA-BSI	5	146	1	43	1	4	12	1	10	C.7	t002	26-23-17-34-17-20-17-12-17-16	Negative	-	Negative	-	-	-	-	-	-	-	-	-	-	Negative	-	-	-	-	-	-	-	-	IVc	A2B2	B	mecA	ΔmecR	-	-	IS1272
	ST146-HUB255	ERS12345113	2009	F	68	Skin and soft tissue	HCA-MRSA-BSI	5	146	1	43	1	4	12	1	10	C.7	t045	26-17-20-17-12-17-16	Negative	-	Negative	-	-	-	-	-	-	-	-	-	-	Negative	-	-	-	-	-	-	-	-	IVc	A2B2	B	mecA	ΔmecR	-	-	IS1272
	ST146-HUB260	ERS12345114	2009	F	65	Unknown	HCA-MRSA-BSI	5	146	1	43	1	4	12	1	10	C.7	t002	26-23-17-34-17-20-17-12-17-16	Negative	-	Negative	-	-	-	-	-	-	-	-	-	-	Negative	-	-	-	-	-	-	-	-	IVc	A2B2	B	mecA	ΔmecR	-	-	IS1272
	ST146-HUB290	ERS12345115	2009	F	65	Unknown	HCA-MRSA-BSI	5	146	1	43	1	4	12	1	10	C.7	t002	26-23-17-34-17-20-17-12-17-16	Negative	-	Negative	-	-	-	-	-	-	-	-	-	-	Negative	-	-	-	-	-	-	-	-	IVc	A2B2	B	mecA	ΔmecR	-	-	IS1272
	ST146-HUB488	ERS12345116	2013	M	74	Respiratory tract	HA-MRSA-BSI	5	125	1	4	1	4	12	1	54	C.2	t067	26-23-17-34-17-20-17-12-17	Negative	-	Negative	-	-	-	-	-	-	-	-	-	-	Negative	-	-	-	-	-	-	-	-	IVc	A2B2	B	mecA	ΔmecR	-	-	IS1272
	ST146slv-HUB607-2	ERS12345117	2016	M	82	Catheter	HCA-MRSA-BSI	5	7423	1	43	296	4	12	1	10	R.1	t548	26-23-17-34-17-20-17-12-16	Negative	-	Negative	-	-	-	-	-	-	-	-	-	-	Negative	-	-	-	-	-	-	-	-	IVc	A2B2	B	mecA	ΔmecR	-	-	IS1272
	ST15slv-HUB58	ERS12345118	2006	M	87	Respiratory tract	HA-MRSA-BSI	15	2222	13	13	1	1	12	11	246	L.1	t084	07-23-12-34-34-12-12-23-02-12-23	Negative	-	Negative	-	-	-	-	-	-	-	-	-	-	Negative	-	-	-	-	-	-	-	-	IVb	A2B2	B	mecA	ΔmecR	-	-	IS1272
	ST1-HUB606	ERS12345119	2016	M	30	Catheter	HA-MRSA-BSI	1	1	1	1	1	1	1	1	1	H.1	t127	07-23-21-16-34-33-13	Negative	-	Negative	-	-	-	-	-	-	-	-	-	-	Negative	-	-	-	-	-	-	-	-	IVa	A2B2	B	mecA	ΔmecR	-	-	IS1272
	ST228-HUB116	ERS12345120	2003	M	85	Respiratory tract	HA-MRSA-BSI	5	228	1	4	1	4	12	24	29	F.4	t2222	26-30-17-34-17-17-12-17-17-16	Negative	-	Negative	-	-	-	-	-	-	-	-	-	-	Negative	-	-	-	-	merR	mercury transporter	merA	merB	I	A1B1	B	mecA	ΔmecR	-	-	IS1272
	ST228-HUB141	ERS12345121	2002	M	83	Respiratory tract	HCA-MRSA-BSI	5	228	1	4	1	4	12	24	29	F.3	t2222	26-30-17-34-17-17-12-17-17-16	Negative	-	Negative	-	-	-	-	-	-	-	-	-	-	Negative	-	-	-	-	merR	mercury transporter	merA	merB	I	A1B1	B	mecA	ΔmecR	-	-	IS1272
	ST228-HUB319	ERS12345122	2000	M	58	Others	HCA-MRSA-BSI	5	228	1	4	1	4	12	24	29	F.2	t001	26-30-17-34-17-20-17-12-17-16	Negative	-	Negative	-	-	-	-	-	-	-	-	-	-	Negative	-	-	-	-	merR	mercury transporter	merA	merB	I	A1B1	B	mecA	ΔmecR	-	-	IS1272
	ST228-HUB355	ERS12345123	2008	F	60	Catheter	HA-MRSA-BSI	5	228	1	4	1	4	12	24	29	F.1	unknown	-	Negative	-	Negative	-	-	-	-	-	-	-	-	-	-	Negative	-	-	-	-	merR	mercury transporter	merA	merB	I	A1B1	B	mecA	ΔmecR	-	-	IS1272
	ST228-HUB386	ERS12345124	2010	F	72	Unknown	HA-MRSA-BSI	5	228	1	4	1	4	12	24	29	F.1	unknown	-	Negative	-	Negative	-	-	-	-	-	-	-	-	-	-	Negative	-	-	-	-	merR	mercury transporter	merA	merB	I	A1B1	B	mecA	ΔmecR	-	-	IS1272
	ST228-HUB483	ERS12345125	2013	F	53	Urinary	HCA-MRSA-BSI	5	228	1	4	1	4	12	24	29	F.2	t001	26-30-17-34-17-20-17-12-17-16	Negative	-	Negative	-	-	-	-	-	-	-	-	-	-	Negative	-	-	-	-	merR	mercury transporter	merA	merB	I	A1B1	B	mecA	ΔmecR	-	-	IS1272
	ST228-HUB614	ERS12345126	2017	F	56	Respiratory tract	CA-MRSA-BSI	5	228	1	4	1	4	12	24	29	F.2	t001	26-30-17-34-17-20-17-12-17-16	Negative	-	Negative	-	-	-	-	-	-	-	-	-	-	Negative	-	-	-	-	merR	mercury transporter	merA	merB	I	A1B1	B	mecA	ΔmecR	-	-	IS1272
	ST228-HUB78	ERS12345127	2005	M	59	Catheter	HCA-MRSA-BSI	5	228	1	4	1	4	12	24	29	F.2	t001	26-30-17-34-17-20-17-12-17-16	Negative	-	Negative	-	-	-	-	-	-	-	-	-	-	Negative	-	-	-	-	merR	mercury transporter	merA	merB	I	A1B1	B	mecA	ΔmecR	-	-	IS1272
	ST22-HUB21	ERS12345128	2007	M	65	Catheter	HA-MRSA-BSI	22	22	7	6	1	5	8	8	6	D.3	t379	26-23-23-13-23-31-29-17-25-17-25-16-28	Negative	-	Negative	-	-	-	-	-	-	-	-	-	-	Negative	-	-	-	-	-	-	-	-	IVh	A2B2	B	mecA	ΔmecR	-	-	IS1272
	ST22-HUB238	ERS12345129	2009	F	74	Unknown	HCA-MRSA-BSI	22	22	7	6	1	5	8	8	6	D.3	t379	26-23-23-13-23-31-29-17-25-17-25-16-28	Negative	-	Negative	-	-	-	-	-	-	-	-	-	-	Negative	-	-	-	-	-	-	-	-	IVh	A2B2	B	mecA	ΔmecR	-	-	IS1272
	ST22-HUB278	ERS12345130	2009	F	73	Skin and soft tissue	HA-MRSA-BSI	22	22	7	6	1	5	8	8	6	D.1	t2107	26-23-23-13-16-31-29-17-25-17-25-16-28	Negative	-	Negative	-	-	-	-	-	-	-	-	-	-	Negative	-	-	-	-	-	-	-	-	IVh	A2B2	B	mecA	ΔmecR	-	-	IS1272
	ST22-HUB292	ERS12345131	2009	M	60	Catheter	HA-MRSA-BSI	22	22	7	6	1	5	8	8	6	D.5	t1036	26-23-23-13-17-31-29-17-25-17-25-16-28	Negative	-	Negative	-	-	-	-	-	-	-	-	-	-	Negative	-	-	-	-	-	-	-	-	IVh	A2B2	B	mecA	ΔmecR	-	-	IS1272
	ST22-HUB368	ERS12345132	2010	F	76	Unknown	HCA-MRSA-BSI	22	22	7	6	1	5	8	8	6	D.4	unknown	-	Negative	-	Negative	-	-	-	-	-	-	-	-	-	-	Negative	-	-	-	-	-	-	-	-	IVh	A2B2	B	mecA	ΔmecR	-	-	IS1272
	ST22-HUB382	ERS12345133	2010	F	74	Unknown	HA-MRSA-BSI	22	22	7	6	1	5	8	8	6	D.4	unknown	-	Negative	-	Negative	-	-	-	-	-	-	-	-	-	-	Negative	-	-	-	-	-	-	-	-	IVh	A2B2	B	mecA	ΔmecR	-	-	IS1272
	ST22-HUB439	ERS12345134	2012	F	80	Catheter	HA-MRSA-BSI	22	22	7	6	1	5	8	8	6	D.2	t379	26-23-23-13-23-31-29-17-25-17-25-16-28	Negative	-	Negative	-	-	-	-	-	-	-	-	-	-	Negative	-	-	-	-	-	-	-	-	IVh	A2B2	B	mecA	ΔmecR	-	-	IS1272
	ST22-HUB516	ERS12345135	2014	M	74	Catheter	HA-MRSA-BSI	22	22	7	6	1	5	8	8	6	D.3	t032	26-23-23-13-23-31-29-17-31-29-17-25-17-25-16-28	Negative	-	Negative	-	-	-	-	-	-	-	-	-	-	Negative	-	-	-	-	-	-	-	-	IVh	A2B2	B	mecA	ΔmecR	-	-	IS1272
	ST22-HUB526	ERS12345136	2014	M	60	Catheter	HCA-MRSA-BSI	22	22	7	6	1	5	8	8	6	D.1	t020	26-23-31-29-17-31-29-17-25-17-25-16-28	Negative	-	Negative	-	-	-	-	-	-	-	-	-	-	Negative	-	-	-	-	-	-	-	-	IVh	A2B2	B	mecA	ΔmecR	-	-	IS1272
	ST22-HUB551	ERS12345137	2015	F	62	Unknown	HCA-MRSA-BSI	22	22	7	6	1	5	8	8	6	D.3	t379	26-23-23-13-23-31-29-17-25-17-25-16-28	Negative	-	Negative	-	-	-	-	-	-	-	-	-	-	Negative	-	-	-	-	-	-	-	-	IVh	A2B2	B	mecA	ΔmecR	-	-	IS1272
	ST22-HUB558	ERS12345138	2018	M	69	Respiratory tract	HA-MRSA-BSI	22	22	7	6	1	5	8	8	6	D.3	t379	26-23-23-13-23-31-29-17-25-17-25-16-28	Negative	-	Negative	-	-	-	-	-	-	-	-	-	-	Negative	-	-	-	-	-	-	-	-	IVh	A2B2	B	mecA	ΔmecR	-	-	IS1272
	ST22-HUB597	ERS12345139	2016	F	83	Catheter	HCA-MRSA-BSI	22	22	7	6	1	5	8	8	6	D.4.1	t18469	26-23-23-31-29-17-25-28	Negative	-	Negative	-	-	-	-	-	-	-	-	-	-	Negative	-	-	-	-	-	-	-	-	IVh	A2B2	B	mecA	ΔmecR	-	-	IS1272
	ST22-HUB609	ERS12345140	2016	F	55	Catheter	HCA-MRSA-BSI	22	22	7	6	1	5	8	8	6	D.3	t379	26-23-23-13-23-31-29-17-25-17-25-16-28	Negative	-	Negative	-	-	-	-	-	-	-	-	-	-	Negative	-	-	-	-	-	-	-	-	IVh	A2B2	B	mecA	ΔmecR	-	-	IS1272
	ST22-HUB635	ERS12345141	2017	M	65	Skin and soft tissue	CA-MRSA-BSI	22	22	7	6	1	5	8	8	6	D.7	t18469	26-23-23-31-29-17-25-28	Negative	-	Negative	-	-	-	-	-	-	-	-	-	-	Negative	-	-	-	-	-	-	-	-	IVh	A2B2	B	mecA	ΔmecR	-	-	IS1272
	ST22slv-HUB512	ERS12345142	2014	M	59	Unknown	HCA-MRSA-BSI	22	22	7	6	1	5	8	8	6	D.1	t2107	26-23-23-13-16-31-29-17-25-17-25-16-28	Negative	-	Negative	-	-	-	-	-	-	-	-	-	-	Negative	-	-	-	-	-	-	-	-	IVh	A2B2	B	mecA	ΔmecR	-	-	IS1272
	ST22slv-HUB605	ERS12345143	2016	M	84	Skin and soft tissue	HCA-MRSA-BSI	22	7424	7	6	127	5	8	8	6	D.3	t032	26-23-23-13-23-31-29-17-31-29-17-25-17-25-16-28	Negative	-	Negative	-	-	-	-	-	-	-	-	-	-	Negative	-	-	-	-	-	-	-	-	IVh	A2B2	B	mecA	ΔmecR	-	-	IS1272
	ST247-HUB144	ERS12345144	1990	F	62	Catheter	HA-MRSA-BSI	8	247	3	3	1	12	4	4	16	B.1	t051	11-19-21-12-21-17-34-24-34-22-25	Negative	-	Negative	-	-	-	-	-	-	-	-	-	-	Negative	-	-	-	-	merR	mercury transporter	merA	merB	Ia	A1B1	B	mecA	ΔmecR	-	-	IS1272
	ST247-HUB145	ERS12345145	1990	F	79	Catheter	HA-MRSA-BSI	8	247	3	3	1	12	4	4	16	B.1	t051	11-19-21-12-21-17-34-24-34-22-25	Negative	-	Negative	-	-	-	-	-	-	-	-	-	-	Negative	-	-	-	-	merR	mercury transporter	merA	merB	Ia	A1B1	B	mecA	ΔmecR	-	-	IS1272
	ST247-HUB146	ERS12345146	1990	M	50	Catheter	HA-MRSA-BSI	8	247	3	3	1	12	4	4	16	B.1	t051	11-19-21-12-21-17-34-24-34-22-25	Negative	-	Negative	-	-	-	-	-	-	-	-	-	-	Negative	-	-	-	-	merR	mercury transporter	merA	merB	Ia	A1B1	B	mecA	ΔmecR	-	-	IS1272
	ST247-HUB163	ERS12345147	1991	M	62	Others	HA-MRSA-BSI	8	247	3	3	1	12	4	4	16	B.1	t051	11-19-21-12-21-17-34-24-34-22-25	Negative	-	Negative	-	-	-	-	-	-	-	-	-	-	Negative	-	-	-	-	merR	mercury transporter	merA	merB	Ia	A1B1	B	mecA	ΔmecR	-	-	IS1272
	ST247-HUB166	ERS12345148	1991	M	81	Catheter	HA-MRSA-BSI	8	247	3	3	1	12	4	4	16	B.1	t051	11-19-21-12-21-17-34-24-34-22-25	Negative	-	Negative	-	-	-	-	-	-	-	-	-	-	Negative	-	-	-	-	merR	mercury transporter	merA	merB	Ia	A1B1	B	mecA	ΔmecR	-	-	IS1272
	ST247-HUB181	ERS12345149	1994	M	62	Catheter	HA-MRSA-BSI	8	247	3	3	1	12	4	4	16	B.1	t051	11-19-21-12-21-17-34-24-34-22-25	Negative	-	Negative	-	-	-	-	-	-	-	-	-	-	Negative	-	-	-	-	merR	mercury transporter	merA	merB	Ia	A1B1	B	mecA	ΔmecR	-	-	IS1272
	ST247-HUB188	ERS12345150	1997	M	52	Unknown	HA-MRSA-BSI	8	247	3	3	1	12	4	4	16	B.6	t051	11-19-21-12-21-17-34-24-34-22-25	Negative	-	Negative	-	-	-	-	-	-	-	-	-	-	Negative	-	-	-	-	merR	mercury transporter	merA	merB	Ia	A1B1	B	mecA	ΔmecR	-	-	IS1272
	ST247-HUB197	ERS12345151	1997	M	75	Catheter	HA-MRSA-BSI	8	247	3	3	1	12	4	4	16	B.3	t051	11-19-21-12-21-17-34-24-34-22-25	Negative	-	Negative	-	-	-	-	-	-	-	-	-	-	Negative	-	-	-	-	merR	mercury transporter	merA	merB	Ia	A1B1	B	mecA	ΔmecR	-	-	IS1272
	ST247-HUB217	ERS12345152	2001	M	30	Catheter	HA-MRSA-BSI	8	247	3	3	1	12	4	4	16	B.2	t051	11-19-21-12-21-17-34-24-34-22-25	Negative	-	Negative	-	-	-	-	-	-	-	-	-	-	Negative	-	-	-	-	merR	mercury transporter	merA	merB	Ia	A1B1	B	mecA	ΔmecR	-	-	IS1272
	ST247-HUB230	ERS12345153	1998	M	48	Others	HA-MRSA-BSI	8	247	3	3	1	12	4	4	16	B.1	t051	11-19-21-12-21-17-34-24-34-22-25	Negative	-	Negative	-	-	-	-	-	-	-	-	-	-	Negative	-	-	-	-	-	-	-	-	Ia	A1B1	B	mecA	ΔmecR	-	-	IS1272
	ST36-HUB391	ERS12345154	2010	F	76	Unknown	HCA-MRSA-BSI	30	36	2	2	2	2	3	3	2	I.1	t012	15-12-16-02-16-02-25-17-24-24	Negative	-	Negative	-	-	-	-	-	-	-	-	-	-	Negative	-	-	-	-	-	-	-	-	II	A2B2	A	mecA	-	mecR1	mecI	IS431
	ST398-HUB324927	ERS12345155	2008	F	89	Unknown	HA-MRSA-BSI	398	398	3	35	19	2	20	26	39	NT-MRSA	t1197	08-16-02-25-46-24-25	Negative	-	Negative	-	-	-	-	-	-	-	-	-	-	Negative	-	-	-	-	-	-	-	-	IVa	A2B2	B	mecA	ΔmecR	-	-	IS1272
	ST398slv-HUB501	ERS12345156	2014	M	64	Others	HCA-MRSA-BSI	398	3207	3	35	19	2	20	26	399	NT-MRSA	t1451	08-16-02-25-34-25	Negative	-	Negative	-	-	-	-	-	-	-	-	-	-	Negative	-	-	-	-	-	-	-	-	Vc	C1	C2	mecA	ΔmecR	-	-	IS431
	ST45-HUB332	ERS12345157	1995	M	45	Skin and soft tissue	HCA-MRSA-BSI	45	45	10	14	8	6	10	3	2	X.1	t073	08-16-02-16-13-17-34-16-34	Negative	-	Negative	-	-	-	-	-	-	-	-	-	-	Negative	-	-	-	-	-	-	-	-	IVa	A2B2	B	mecA	ΔmecR	-	-	IS1272
	ST50-HUB340	ERS12345158	1992	M	93	Unknown	HCA-MRSA-BSI	50	50	16	16	12	2	13	13	15	K.1	t185	04-20-17-23-20-17	Negative	-	Negative	-	-	-	-	-	-	-	-	-	-	Negative	-	-	-	-	-	-	-	-	IVa	A2B2	B	mecA	ΔmecR	-	-	IS1272
	ST59-HUB84	ERS12345159	2004	F	58	Others	HA-MRSA-BSI	59	59	19	23	15	2	19	20	15	J.1	t216	04-20-17-20-17-31-16-34	Negative	-	Negative	-	-	-	-	-	-	-	-	-	-	Negative	-	-	-	-	-	-	-	-	V	C1	C2	mecA	ΔmecR	-	-	IS431
	ST5-HUB420	ERS12345160	2011	M	83	Urinary	CA-MRSA-BSI	5	5	1	4	1	4	12	1	10	C.0	t002	26-23-17-34-17-20-17-12-17-16	Negative	-	Negative	-	-	-	-	-	-	-	-	-	-	Negative	-	-	-	-	-	-	-	-	IVc	A2B2	B	mecA	ΔmecR	-	-	IS1272
	ST5slv-HUB543	ERS12345161	2015	F	76	Endocarditis	HA-MRSA-BSI	5	3418	1	574	1	4	12	1	10	C.6	t002	26-23-17-34-17-20-17-12-17-16	Negative	-	Negative	-	-	-	-	-	-	-	-	-	-	Negative	-	-	-	-	-	-	-	-	IVc	A2B2	B	mecA	ΔmecR	-	-	IS1272
	ST72-HUB307	ERS12345162	2000	M	85	Catheter	HA-MRSA-BSI	72	72	1	4	1	8	4	4	3	E.3	t3288	07-23-12-21-12-17-12-12-17	Negative	-	Negative	-	-	-	-	-	-	-	-	-	-	Negative	-	-	-	-	-	-	-	-	IVc	A2B2	B	mecA	ΔmecR	-	-	IS1272
	ST72-HUB402	ERS12345163	2011	F	67	Urinary	HA-MRSA-BSI	72	72	1	4	1	8	4	4	3	E.1	t148	07-23-12-21-12-17-20-17-12-12-17	Negative	-	Negative	-	-	-	-	-	-	-	-	-	-	Negative	-	-	-	-	-	-	-	-	IVc	A2B2	B	mecA	ΔmecR	-	-	IS1272
	ST72-HUB521	ERS12345164	2014	F	51	Others	HA-MRSA-BSI	72	72	1	4	1	8	4	4	3	E.2	t18240	07-17-12-12-17	Negative	-	Negative	-	-	-	-	-	-	-	-	-	-	Negative	-	-	-	-	-	-	-	-	IVc	A2B2	B	mecA	ΔmecR	-	-	IS1272
	ST72-HUB64	ERS12345165	2006	M	74	Osteoarticular	HCA-MRSA-BSI	72	72	1	4	1	8	4	4	3	E.1	t148	07-23-12-21-12-17-20-17-12-12-17	Negative	-	Negative	-	-	-	-	-	-	-	-	-	-	Negative	-	-	-	-	-	-	-	-	IVc	A2B2	B	mecA	ΔmecR	-	-	IS1272
	ST8-HUB105	ERS12345166	2004	M	72	Urinary	HCA-MRSA-BSI	8	8	3	3	1	1	4	4	3	A.1	t008	11-19-12-21-17-34-24-34-22-25	Positive	lukFS-PV	Negative	-	-	-	-	-	-	copA	copB	mco	copL	COMER	abi-α	NPD	LysR-like	MSF-transporter	merR	mercury transporter	merA	merB	IVc	A2B2	B	mecA	ΔmecR	-	-	IS1272
	ST8-HUB111	ERS12345167	2003	F	74	Unknown	HCA-MRSA-BSI	8	8	3	3	1	1	4	4	3	A.1	t9529	11-19-19-12-12-34-24-34-22-25	Negative	-	Negative	-	-	-	-	-	-	-	-	-	-	Negative	-	-	-	-	-	-	-	-	IVc	A2B2	B	mecA	ΔmecR	-	-	IS1272
	ST8-HUB23	ERS12345168	2007	M	81	Others	HCA-MRSA-BSI	8	8	3	3	1	1	4	4	3	A.1	t008	11-19-12-21-17-34-24-34-22-25	Negative	-	Negative	-	-	-	-	-	-	-	-	-	-	Negative	-	-	-	-	-	-	-	-	IVc	A2B2	B	mecA	ΔmecR	-	-	IS1272
	ST8-HUB3	ERS12345169	2008	M	70	Unknown	HCA-MRSA-BSI	8	8	3	3	1	1	4	4	3	A.1	t008	11-19-12-21-17-34-24-34-22-25	Negative	-	Negative	-	-	-	-	-	-	-	-	-	-	Negative	-	-	-	-	-	-	-	-	IVc	A2B2	B	mecA	ΔmecR	-	-	IS1272
	ST8-HUB365	ERS12345170	2010	F	62	Unknown	HCA-MRSA-BSI	8	8	3	3	1	1	4	4	3	A.2	t008	11-19-12-21-17-34-24-34-22-25	Positive	lukFS-PV	Negative	-	-	-	-	-	-	copA	copB	mco	copL	Negative	-	-	-	-	-	-	-	-	IVc	A2B2	B	mecA	ΔmecR	-	-	IS1272
	ST8-HUB377	ERS12345171	2010	M	85	Respiratory tract	HCA-MRSA-BSI	8	8	3	3	1	1	4	4	3	A.1	t008	11-19-12-21-17-34-24-34-22-25	Negative	-	Negative	-	-	-	-	-	-	-	-	-	-	Negative	-	-	-	-	-	-	-	-	IVc	A2B2	B	mecA	ΔmecR	-	-	IS1272
	ST8-HUB418	ERS12345172	2011	M	68	Unknown	HA-MRSA-BSI	8	8	3	3	1	1	4	4	3	A.4	t008	11-19-12-21-17-34-24-34-22-25	Negative	-	Negative	-	-	-	-	-	-	-	-	-	-	Negative	-	-	-	-	-	-	-	-	IVc	A2B2	B	mecA	ΔmecR	-	-	IS1272
	ST8-HUB419	ERS12345173	2011	M	77	Catheter	HA-MRSA-BSI	8	8	3	3	1	1	4	4	3	A.1	t008	11-19-12-21-17-34-24-34-22-25	Positive	lukFS-PV	Negative	-	-	-	-	-	-	-	-	-	-	Negative	-	-	-	-	-	-	-	-	IVb	A2B2	B	mecA	ΔmecR	-	-	IS1272
	ST8-HUB444	ERS12345174	2012	M	67	Urinary	HA-MRSA-BSI	8	8	3	3	1	1	4	4	3	A.2	t008	11-19-12-21-17-34-24-34-22-25	Negative	-	Negative	-	-	-	-	-	-	-	-	-	-	Negative	-	-	-	-	-	-	-	-	IVc	A2B2	B	mecA	ΔmecR	-	-	IS1272
	ST8-HUB451	ERS12345175	2012	M	31	Others	CA-MRSA-BSI	8	8	3	3	1	1	4	4	3	B.168	t008	11-19-12-21-17-34-24-34-22-25	Positive	lukFS-PV	Negative	-	-	-	-	-	-	copA	copB	mco	copL	COMER	abi-α	NPD	LysR-like	MSF-transporter	merR	mercury transporter	merA	merB	IVc	A2B2	B	mecA	ΔmecR	-	-	IS1272
	ST8-HUB465	ERS12345176	2013	M	87	Unknown	HCA-MRSA-BSI	8	8	3	3	1	1	4	4	3	A.4	t008	11-19-12-21-17-34-24-34-22-25	Negative	-	Negative	-	-	-	-	-	-	-	-	-	-	Negative	-	-	-	-	-	-	-	-	IVc	A2B2	B	mecA	ΔmecR	-	-	IS1272
	ST8-HUB486	ERS12345177	2013	F	83	Skin and soft tissue	HCA-MRSA-BSI	8	8	3	3	1	1	4	4	3	B.162	t008	11-19-12-21-17-34-24-34-22-25	Positive	lukFS-PV	ACME-I	I	arcABCD	opp3ABC	speG	argR	aliD	copA	copB2	-	copL2	Negative	-	-	-	-	-	-	-	-	IVa	A2B2	B	mecA	ΔmecR	-	-	IS1272
	ST8-HUB500	ERS12345178	2014	M	80	Unknown	CA-MRSA-BSI	8	8	3	3	1	1	4	4	3	A.1	t008	11-19-12-21-17-34-24-34-22-25	Negative	-	Negative	-	-	-	-	-	-	-	-	-	-	Negative	-	-	-	-	-	-	-	-	IVc	A2B2	B	mecA	ΔmecR	-	-	IS1272
	ST8-HUB506	ERS12345179	2014	M	74	Catheter	HCA-MRSA-BSI	8	8	3	3	1	1	4	4	3	A.3	t008	11-19-12-21-17-34-24-34-22-25	Negative	-	Negative	-	-	-	-	-	-	-	-	-	-	Negative	-	-	-	-	-	-	-	-	IVc	A2B2	B	mecA	ΔmecR	-	-	IS1272
	ST8-HUB529	ERS12345180	2014	M	88	Unknown	HCA-MRSA-BSI	8	8	3	3	1	1	4	4	3	A.6	t008	11-19-12-21-17-34-24-34-22-25	Negative	-	Negative	-	-	-	-	-	-	-	-	-	-	Negative	-	-	-	-	-	-	-	-	IVc	A2B2	B	mecA	ΔmecR	-	-	IS1272
	ST8-HUB550	ERS12345181	2015	F	82	Skin and soft tissue	CA-MRSA-BSI	8	8	3	3	1	1	4	4	3	A.1	t008	11-19-12-21-17-34-24-34-22-25	Positive	lukFS-PV	Negative	-	-	-	-	-	-	copA	copB	mco	copL	Negative	-	-	-	-	-	-	-	-	IVc	A2B2	B	mecA	ΔmecR	-	-	IS1272
	ST8-HUB560	ERS12345182	2018	F	36	Skin and soft tissue	CA-MRSA-BSI	8	8	3	3	1	1	4	4	3	B.163	t1882	11-19-12-21-22-17-34-24-34-22-25	Positive	lukFS-PV	Negative	-	-	-	-	-	-	copA	copB	mco	copL	COMER	abi-α	NPD	LysR-like	MSF-transporter	merR	mercury transporter	merA	merB	IVc	A2B2	B	mecA	ΔmecR	-	-	IS1272
	ST8-HUB561	ERS12345183	2018	M	54	Respiratory tract	HCA-MRSA-BSI	8	8	3	3	1	1	4	4	3	B.161	t008	11-19-12-21-17-34-24-34-22-25	Positive	lukFS-PV	ACME-I	I	arcABCD	opp3ABC	speG	argR	aliD	copA	copB2	-	copL2	Negative	-	-	-	-	-	-	-	-	IVa	A2B2	B	mecA	ΔmecR	-	-	IS1272
	ST8-HUB564	ERS12345184	2018	M	77	Catheter	HCA-MRSA-BSI	8	8	3	3	1	1	4	4	3	A.2	t2849	11-19-17-34-24-34-22-25	Negative	-	Negative	-	-	-	-	-	-	-	-	-	-	Negative	-	-	-	-	-	-	-	-	IVc	A2B2	B	mecA	ΔmecR	-	-	IS1272
	ST8-HUB571	ERS12345185	2018	F	80	Unknown	HA-MRSA-BSI	8	8	3	3	1	1	4	4	3	B.161	t008	11-19-12-21-17-34-24-34-22-25	Positive	lukFS-PV	ACME-I	I	arcABCD	opp3ABC	speG	argR	aliD	copA	copB2	-	copL2	Negative	-	-	-	-	-	-	-	-	IVa	A2B2	B	mecA	ΔmecR	-	-	IS1272
	ST8-HUB582	ERS12345186	2016	F	81	Catheter	HCA-MRSA-BSI	8	8	3	3	1	1	4	4	3	A.2.3	t008	11-19-12-21-17-34-24-34-22-25	Negative	-	Negative	-	-	-	-	-	-	-	-	-	-	Negative	-	-	-	-	-	-	-	-	IVc	A2B2	B	mecA	ΔmecR	-	-	IS1272
	ST8-HUB587	ERS12345187	2016	F	98	Endocarditis	HCA-MRSA-BSI	8	8	3	3	1	1	4	4	3	A.2.3	t008	11-19-12-21-17-34-24-34-22-25	Negative	-	Negative	-	-	-	-	-	-	-	-	-	-	Negative	-	-	-	-	-	-	-	-	IVc	A2B2	B	mecA	ΔmecR	-	-	IS1272
	ST8-HUB589	ERS12345188	2016	M	44	Osteoarticular	HCA-MRSA-BSI	8	8	3	3	1	1	4	4	3	A.1	t024	11-12-21-17-34-24-34-22-25	Negative	-	Negative	-	-	-	-	-	-	-	-	-	-	Negative	-	-	-	-	-	-	-	-	IVc	A2B2	B	mecA	ΔmecR	-	-	IS1272
	ST8-HUB598	ERS12345189	2016	F	86	Catheter	HA-MRSA-BSI	8	8	3	3	1	1	4	4	3	A.2	t2849	11-19-17-34-24-34-22-25	Negative	-	Negative	-	-	-	-	-	-	-	-	-	-	Negative	-	-	-	-	-	-	-	-	IVc	A2B2	B	mecA	ΔmecR	-	-	IS1272
	ST8-HUB608	ERS12345190	2016	F	62	Respiratory tract	CA-MRSA-BSI	8	8	3	3	1	1	4	4	3	B.161	t008	11-19-12-21-17-34-24-34-22-25	Positive	lukFS-PV	ACME-I	I	arcABCD	opp3ABC	speG	argR	aliD	copA	copB2	-	copL2	Negative	-	-	-	-	-	-	-	-	IVa	A2B2	B	mecA	ΔmecR	-	-	IS1272
	ST8-HUB615	ERS12345191	2017	M	89	Catheter	HA-MRSA-BSI	8	8	3	3	1	1	4	4	3	A.2	t008	11-19-12-21-17-34-24-34-22-25	Negative	-	Negative	-	-	-	-	-	-	-	-	-	-	Negative	-	-	-	-	-	-	-	-	IVc	A2B2	B	mecA	ΔmecR	-	-	IS1272
	ST8-HUB632	ERS12345192	2017	F	73	Osteoarticular	HCA-MRSA-BSI	8	8	3	3	1	1	4	4	3	A.4	t2849	11-19-17-34-24-34-22-25	Negative	-	Negative	-	-	-	-	-	-	-	-	-	-	Negative	-	-	-	-	-	-	-	-	IVc	A2B2	B	mecA	ΔmecR	-	-	IS1272
	ST8-HUB633	ERS12345193	2017	M	51	Endocarditis	HCA-MRSA-BSI	8	8	3	3	1	1	4	4	3	B.164	t211	11-19-12-12-21-17-34-24-34-22-25	Positive	lukFS-PV	Negative	-	-	-	-	-	-	copA	copB	mco	copL	COMER	abi-α	NPD	LysR-like	MSF-transporter	merR	mercury transporter	merA	merB	IVc	A2B2	B	mecA	ΔmecR	-	-	IS1272
	ST8-HUB8	ERS12345194	2008	F	84	Others	HA-MRSA-BSI	8	8	3	3	1	1	4	4	3	A.1	t008	11-19-12-21-17-34-24-34-22-25	Negative	-	Negative	-	-	-	-	-	-	-	-	-	-	Negative	-	-	-	-	-	-	-	-	IVc	A2B2	B	mecA	ΔmecR	-	-	IS1272
	ST8-HUB93	ERS12345195	2004	M	45	Skin and soft tissue	HCA-MRSA-BSI	8	8	3	3	1	1	4	4	3	A.1	t008	11-19-12-21-17-34-24-34-22-25	Positive	lukFS-PV	Negative	-	-	-	-	-	-	copA	copB	mco	copL	COMER	abi-α	NPD	LysR-like	MSF-transporter	merR	mercury transporter	merA	merB	IVc	A2B2	B	mecA	ΔmecR	-	-	IS1272
	ST8slv-HUB477	ERS12345196	2013	F	64	Catheter	HA-MRSA-BSI	8	2840	3	3	1	1	4	4	334	B.164	t008	11-19-12-21-17-34-24-34-22-25	Positive	lukFS-PV	Negative	-	-	-	-	-	-	copA	copB	mco	copL	COMER	abi-α	NPD	LysR-like	MSF-transporter	merR	mercury transporter	merA	merB	IVc	A2B2	B	mecA	ΔmecR	-	-	IS1272
	ST8slv-HUB577	ERS12345197	2018	F	44	Urinary	CA-MRSA-BSI	8	923	3	3	1	1	4	4	109	A.7	t1635	11-19-12-21-17-34-25	Positive	lukFS-PV	Negative	-	-	-	-	-	-	-	-	-	-	Negative	-	-	-	-	-	-	-	-	IVa	A2B2	B	mecA	ΔmecR	-	-	IS1272
